# Supplementary material for: H/D solvent isotope effects on the photoracemization reaction of enantiomeric the tris(2,2′-bipyridine)ruthenium(ii) complex and its analogues
Source: Royal Society of Chemistry journal article supplement (doi:10.1039/c9cp06758b), 2020-01-01
Supplement: c9cp06758b1.pdf [file c9cp06758b1.pdf]

Supplementary Information

## H/D solvent isotope effects on photoracemization reaction of enantiomeric tris(2,2'-bipyridine)ruthenium(II) complex and its analogues.

Masahiro Asahara, Haruhiko Kurimoto, Masato Nakamizu, Shingo Hattori and Kazuteru Shinozaki\*

*Department of Materials Science, Graduate School of Nanobioscience, Yokohama City University,  
22-2 Seto, Kanazawa-ku, Yokohama 236-0027 JAPAN*

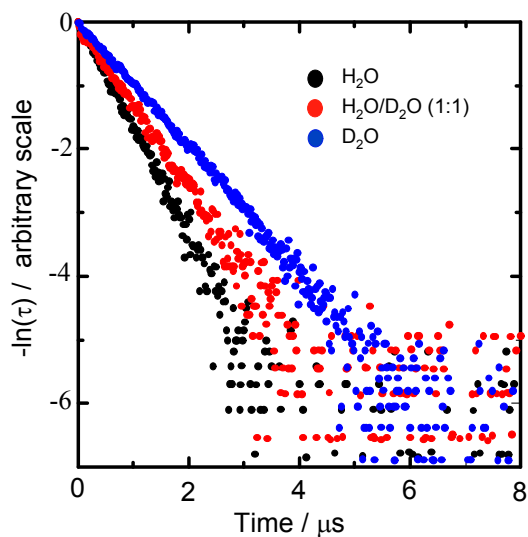

**Figure S1.** Emission decays for [Ru(bpy)<sub>3</sub>]<sup>2+</sup> in H<sub>2</sub>O, H<sub>2</sub>/D<sub>2</sub>O (1:1) and D<sub>2</sub>O.

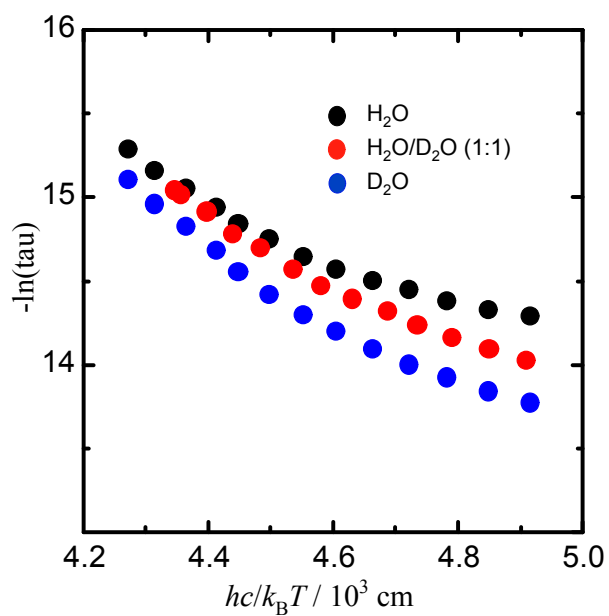

**Figure S2.** Temperature dependence in emission lifetimes for  $[\text{Ru}(\text{bpy})_3]^{2+}$  in  $\text{H}_2\text{O}$ ,  $\text{H}_2/\text{D}_2\text{O}$  (1:1) and  $\text{D}_2\text{O}$ .

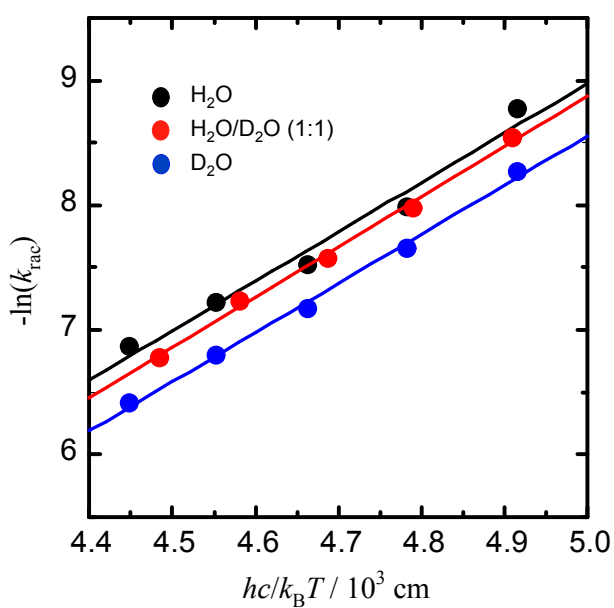

**Figure S3.** Temperature dependence in photoracemization rates for  $[\text{Ru}(\text{bpy})_3]^{2+}$  in  $\text{H}_2\text{O}$ ,  $\text{H}_2/\text{D}_2\text{O}$  (1:1) and  $\text{D}_2\text{O}$ .
